# Supplementary material for: TNAP and P2X7R: New Plasma Biomarkers for Alzheimer’s Disease
Source: MDPI journal article supplement (doi:10.3390/ijms241310897), 2023-06-30
Supplement: s1 [file s1]

**Table S1.** Correlation (r) between MRI Fazekas scale and P2X7R levels or %TNAP activity for each diagnostic group.

| <b>MRI Fazekas vs.</b> | <b>Control</b>                       | <b>MCI</b>                           | <b>AD</b>                           |
|------------------------|--------------------------------------|--------------------------------------|-------------------------------------|
| P2X7R levels           | r=-0.143<br>p(two tailed)=0.514 (ns) | r=-0.123<br>p(two tailed)=0.634 (ns) | r=0.156<br>p(two tailed)=0.563 (ns) |
| %TNAPactivity          | r=-0.225<br>p(two tailed)=0.302 (ns) | r=0.167<br>p(two tailed)=0.516 (ns)  | r=0.209<br>p(two tailed)=0.434 (ns) |

Nonparametric Spearman correlation (r) computed between two selected data sets.

**Table S2.** Correlation (r) between neuropsychological tests and P2X7R levels or %TNAP activity for control and MCI group.

| <b>MMSE vs.</b> | <b>Control</b>                       | <b>MCI</b>                                       |
|-----------------|--------------------------------------|--------------------------------------------------|
| P2X7R levels    | r=-0.095<br>p(two tailed)=0.680 (ns) | <b>r=0.594</b><br><b>p(two tailed)=0.028 (*)</b> |
| %TNAPactivity   | r=0.136<br>p(two tailed)=0.558 (ns)  | r=0.132<br>p(two tailed)=0.651 (ns)              |
| <b>FAQ vs.</b>  | <b>Control</b>                       | <b>MCI</b>                                       |
| P2X7R levels    | r=-0.156<br>p(two tailed)=0.500 (ns) | r=-0.395<br>p(two tailed)=0.162 (ns)             |
| %TNAPactivity   | r=-0.110<br>p(two tailed)=0.634 (ns) | r=-0.453<br>p(two tailed)=0.105 (ns)             |
| <b>CDT vs.</b>  | <b>Control</b>                       | <b>MCI</b>                                       |
| P2X7R levels    | r=-0.262<br>p(two tailed)=0.251 (ns) | r=0.247<br>p(two tailed)=0.392 (ns)              |
| %TNAPactivity   | r=0.093<br>p(two tailed)=0.688 (ns)  | r=-0.056<br>p(two tailed)=0.848 (ns)             |
| <b>GDS vs.</b>  | <b>Control</b>                       | <b>MCI</b>                                       |
| P2X7R levels    | r=-0.340<br>p(two tailed)=0.131 (ns) | r=-0.232<br>p(two tailed)=0.421 (ns)             |
| %TNAPactivity   | r=0.107<br>p(two tailed)=0.644 (ns)  | <b>r=0.744</b><br><b>p(two tailed)=0.003(**)</b> |

Nonparametric Spearman correlation (r) computed between two selected data sets.

\*  $p < 0.05$ , \*\*  $p < 0.01$ .
